# Supplementary material for: Top-down synthesis of sponge-like Mn3O4at low temperature
Source: Royal Society of Chemistry journal article supplement (doi:10.1039/c9ra03893k), 2019-01-01
Supplement: c9ra03893k1.pdf [file c9ra03893k1.pdf]

## Supplementary Information

### Top-down synthesis of sponge-like Mn<sub>3</sub>O<sub>4</sub> at low temperature

Wangwei Lu,<sup>a</sup> Kay He <sup>a</sup>, Gaoling Zhao\*<sup>a</sup>, Bin Song <sup>b</sup>, Jing Zhou <sup>a, c</sup>, Weixia Dong <sup>a, d</sup>, Gaorong Han <sup>a</sup>

<sup>a</sup> State Key Laboratory of Silicon Materials and School of Materials Science and Engineering,  
Zhejiang University, Hangzhou 310027, P. R. China.

<sup>b</sup> State Key Laboratory of Silicon Materials and Department of Physics, Zhejiang University,  
Hangzhou 310027, P. R. China.

<sup>c</sup> Department of Forensic Science, Zhejiang Police College, Hangzhou 310053, P. R. China.

<sup>d</sup> School of Materials Science and Engineering, Jingdezhen Ceramic Institute, Jingdezhen, Jiangxi  
333403, China.

### N<sub>2</sub> adsorption-desorption analysis of manganese formate

The surface area and pore structure of manganese formate was measured with N<sub>2</sub> adsorption and desorption isotherms by BET (Brunauer Emmette Teller) and DFT (Density functional theory) methods. Fig. S1 shows N<sub>2</sub> adsorption-desorption isotherm of manganese formate prepared with 0.68 M formic acid and DFT pore size distribution. The BET surface area of manganese formate was calculated to be 8.06 m<sup>2</sup>/g, which can be ascribed to abundant channels in manganese formate. The average pore diameter is 3.97 nm (see the inset of Fig. S1).

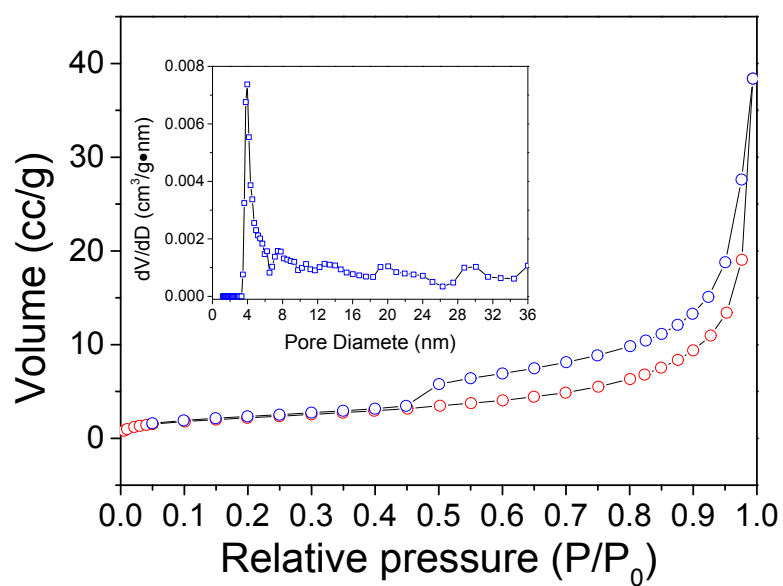

Fig. S1 N<sub>2</sub> adsorption-desorption isotherm of manganese formate prepared with 0.68 M formic acid (Inset: DFT pore size distribution).
